# Supplementary material for: Gain-of-function mutation in TASK-4 channels and severe cardiac conduction disorder
Source: PubMed Central journal article supplement (PMC4119356; doi:10.15252/emmm.201303783), 2014-06-27
Supplement: emmm0006-0937-SD2.pdf [file emmm0006-0937-SD2.pdf]

## Supplementary Figure G2

| nucleotide               | protein     |
|--------------------------|-------------|
| <b>synonymous</b>        |             |
| c.339C>T                 | p.Thr113Thr |
| c.435C>T                 | p.Leu145Leu |
| c.591G>A                 | p.Arg197Arg |
| c.540G>A                 | p.Ala180Ala |
| c.735G>A                 | p.Val245Val |
| c.993C>T                 | p.Asp331Asp |
| <b>non-synonymous</b>    |             |
| c.61A>G                  | p.Ser21Gly  |
| c.181G>A                 | p.Glu61Lys  |
| c.265G>A                 | p.Ala89Thr  |
| c.923A>G                 | p.Tyr308Cys |
| <b>in-frame deletion</b> |             |
| c.324_326del             | p.Phe109del |
| <b>intronic SNVs</b>     |             |
| c.353-16C>A              | -           |
| c.238-11C>G              | -           |
| c.1-23G>C                | -           |

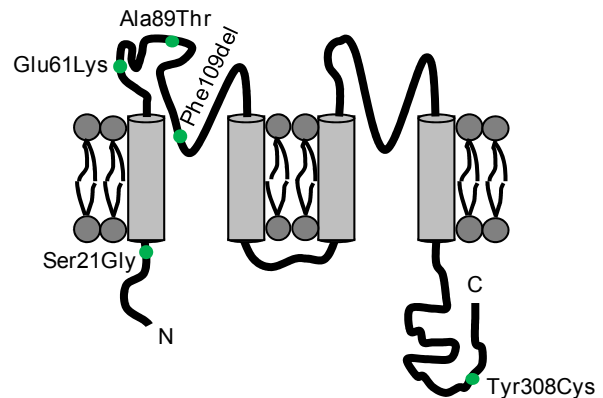

### Supplementary Figure G2

Polymorphic sites in the *KCNK17* gene. In the patient cohort, a total of 14 polymorphic nucleotide sites were identified in *KCNK17*. TASK-4  $\alpha$ -subunit illustrating the localization of amino-acid exchanges (in green). All nucleotide variants were not considered as disease-causing because of benign pathogenicity prediction.
